# Supplementary material for: The global challenges and opportunities in the practice of rheumatology: White paper by the World Forum on Rheumatic and Musculoskeletal Diseases
Source: PubMed Central journal article supplement (PMC4408363; doi:10.1007/s10067-014-2841-6), 2014-12-14
Supplement: 10067_2014_2841_MOESM1_ESM.pdf [file 10067_2014_2841_MOESM1_ESM.pdf]

**Article Title:** The Global Challenges and Opportunities in the Practice of Rheumatology: White Paper by the World Forum on Rheumatic and Musculoskeletal Diseases

**Journal Name:** Clinical Rheumatology

**Authors:** Mustafa Al Maini,<sup>1</sup> Femi Adelowo, Jamal Al Saleh, Yousef Al Weshahi, Gerd-Rüdiger Burmester, Maurizio Cutolo, Joseph Flood, Lyn March, Heather McDonald-Blumer, Kevin Pile, Carlos Pineda, Carter Thorne, Tore K Kvien

<sup>1</sup>Mafrag Hospital, Abu Dhabi, United Arab Emirates;

**Email address for corresponding author:** [mmaini@wfrmd.org](mailto:mmaini@wfrmd.org)

## **SUPPLEMENTARY MATERIAL**

### **Useful online resources for the Rheumatic and Musculoskeletal Diseases (RMDs)**

#### **GLOBAL WEBSITES**

- **World Forum for the Rheumatic and Musculoskeletal Diseases**  
<http://www.wfrmd.org/>
- **International League of Associations for Rheumatology (ILAR)**  
<http://www.ilar.org/>
- **Community Oriented Program for Control of Rheumatic Diseases (COPCORD)**  
<http://www.copcord.org/>
- **Pediatric Rheumatology International Trials Organisation (PRINTO)**  
<https://www.printo.it/>
- **United Nations Dag Hammarskjöld Library, Non-communicable diseases (NCDs) and the post-2015 development agenda**  
<http://research.un.org/en/NCD2015>
- **Rheumatology Nurses Society**  
<http://rnsnurse.org/>
- **Applied Clinical Research, Clinical Trials and Regulatory Affairs Journal**  
<http://benthamscience.com/journal/index.php?journalID=actra>
- **FRAX® WHO Fracture Risk Assessment Tool**  
<http://www.shef.ac.uk/FRAX/>

## **REGIONAL WEBSITES**

### *US*

- **American College of Rheumatology (ACR)**  
<http://www.rheumatology.org/>
  - **ACR RhMSUS program**  
<http://www.rheumatology.org/RhMSUS/>
  - **ACR Simple Tasks Campaign**  
<http://simpletasks.org/about/>
  - **ACR US Rheumatology Research Foundation**  
<http://www.rheumatology.org/Foundation/>
- **US Arthritis Foundation**  
<http://www.arthritis.org/>

### *Canada*

- **Arthritis Alliance Canada**  
<http://www.arthritisalliance.ca/en/>
- **Canadian Rheumatology Association**  
<http://rheum.ca/>
  - **Canadian Initiative for Outcomes in Rheumatology cAre (CIORA)**  
<http://rheum.ca/en/ciora/>
- **Grand challenges Canada**  
<http://www.grandchallenges.ca/>

### *Europe*

- **European League Against Rheumatism (EULAR)**  
<http://www.eular.org/>
  - **Emerging EULAR network (EMEUNET)**  
[emeunet.eular.org](http://emeunet.eular.org)
  - **EULAR online course on Rheumatic Diseases**  
[http://www.eular.org/index.cfm?framePage=/edu\\_online\\_course.cfm](http://www.eular.org/index.cfm?framePage=/edu_online_course.cfm)
  - **National organisations of people with arthritis/rheumatism (PARE)**  
<http://www.eular.org/>
  - **EULAR Standing Committee on Education and Training (ESCET)**  
<http://www.eular.org/>
  - **EULAR Horizon 2020 Press Release**  
[http://www.eular.org/congresspressreleases/Horizon\\_2020\\_and\\_FOREUM\\_FINAL.pdf](http://www.eular.org/congresspressreleases/Horizon_2020_and_FOREUM_FINAL.pdf)
- **Eumusc.net, The European musculoskeletal surveillance and information network**

<http://www.eumusc.net/>

- **Pediatric Rheumatology European Society (PReS)**  
[www.pres.org.uk](http://www.pres.org.uk)

*Rest of world*

- **Pan-American League of Associations for Rheumatology (PANLAR)**  
<http://www.panlar.org/>
- **Asia Pacific League of Associations for Rheumatology (APLAR)**  
<http://www.aplar.org/Pages/Home.aspx>
- **Indian Rheumatology Association**  
<http://www.indianrheumatology.org/>
- **African League of Associations for Rheumatology (AFLAR)**  
<http://www.aflar.net/index.php>
- **Arab League Against Rheumatism (ARLAR)**  
<http://www.arlar.org/>
- **Abu Dhabi Advanced Rheumatology Review Course**  
<http://www.adarrc.org/>
